# Supplementary material for: An improved enzymatic method for the preparation of (R)-phenylacetyl carbinol
Source: Royal Society of Chemistry journal article supplement (doi:10.1039/c7ra04641c), 2017-01-01

## An Improved Enzymatic Method for the Preparation of (*R*)-Phenylacetyl Carbinol

Heng Li, Nan Liu, Xian Hui, and Wen-Yun Gao

I. The result of HPLC analysis of R-PAC:

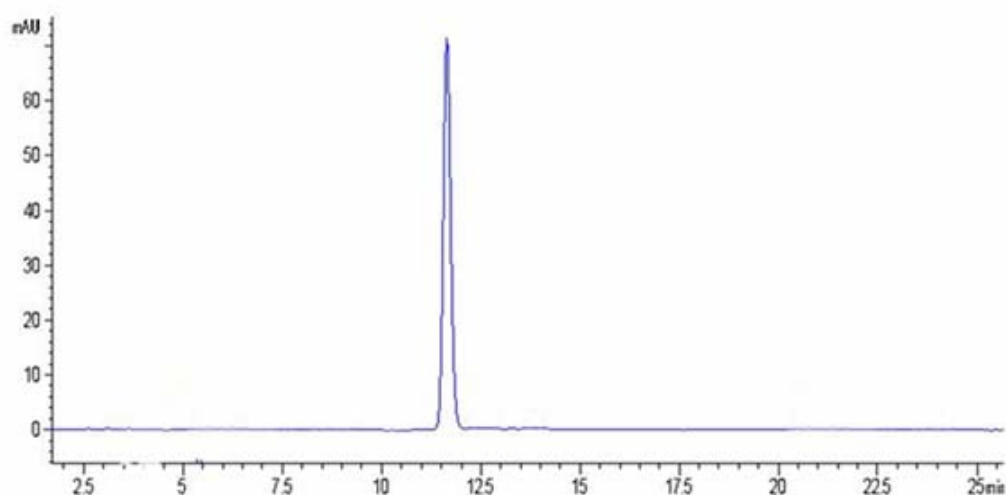

II. HR-ESI-MS of R-PAC:

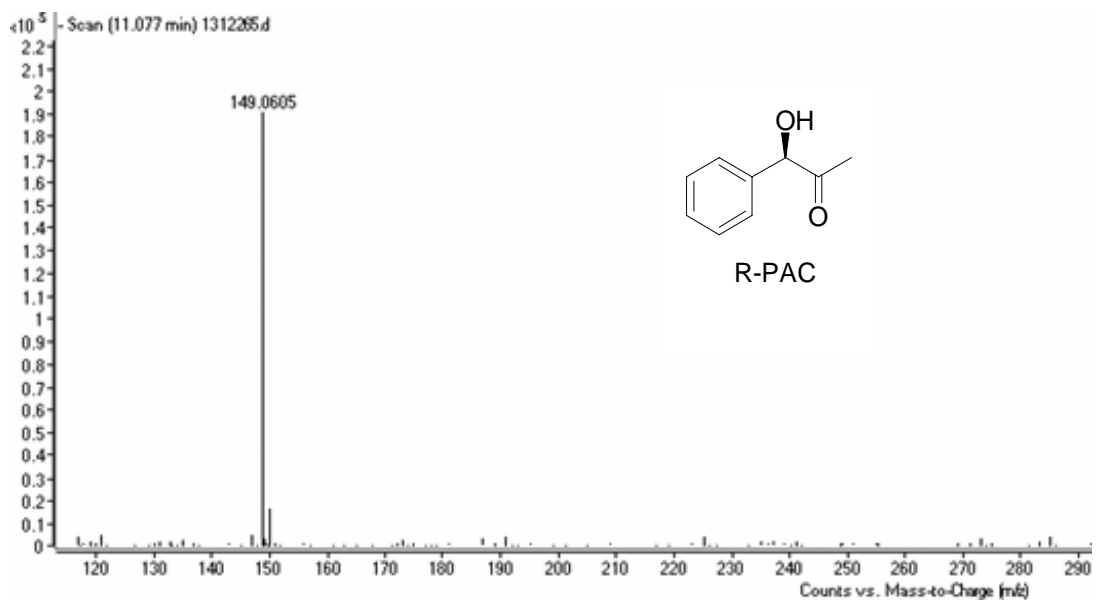

III. Chiral HPLC for the determination of ee value:

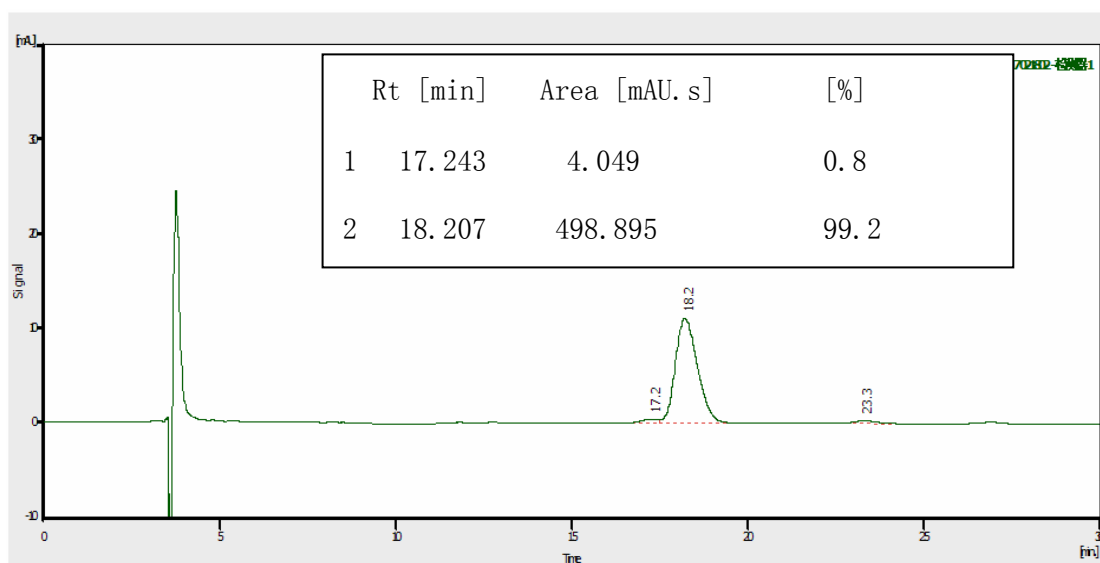

IV.  $^1\text{H}$  and  $^{13}\text{C}$ -NMR spectra of R-PAC:

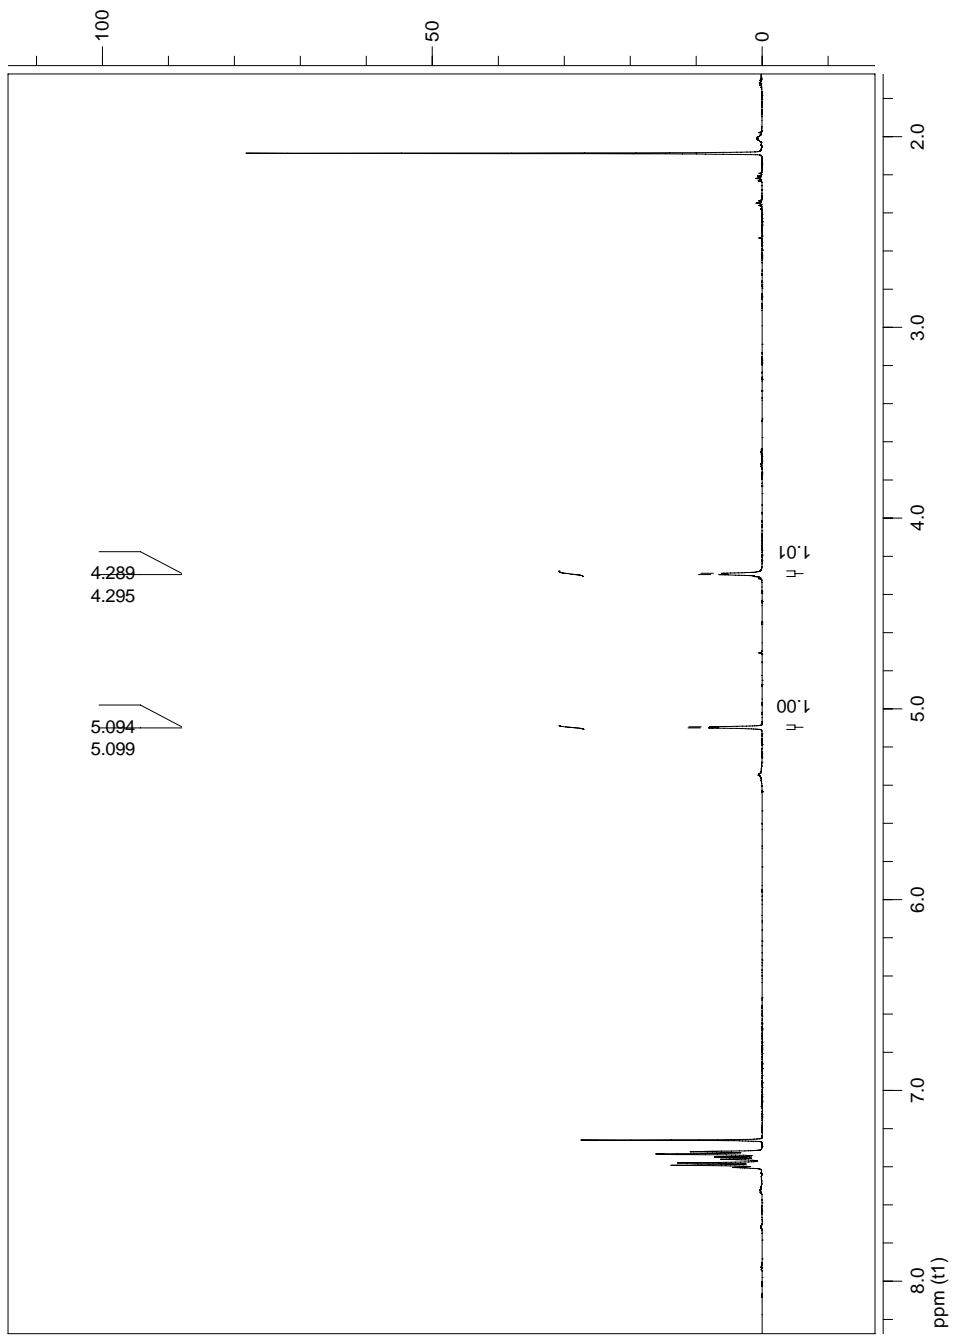

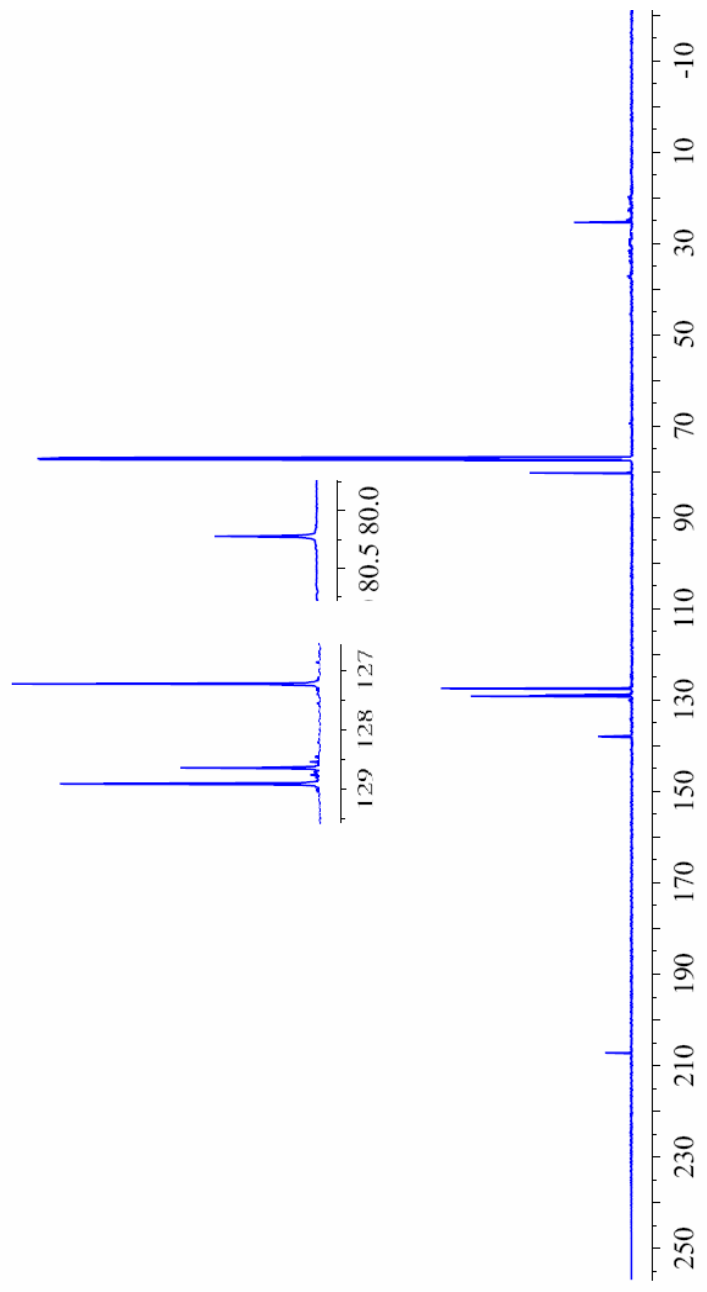

Supplement: c7ra04641c1.pdf [file c7ra04641c1.pdf]
